# Supplementary material
Source: publisher site journal article supplement (https://www.dovepress.com/article/248667)
Supplement: Supplementary file 1 [file get_supplementary_file.php]

**Supplementary Figure:**

**
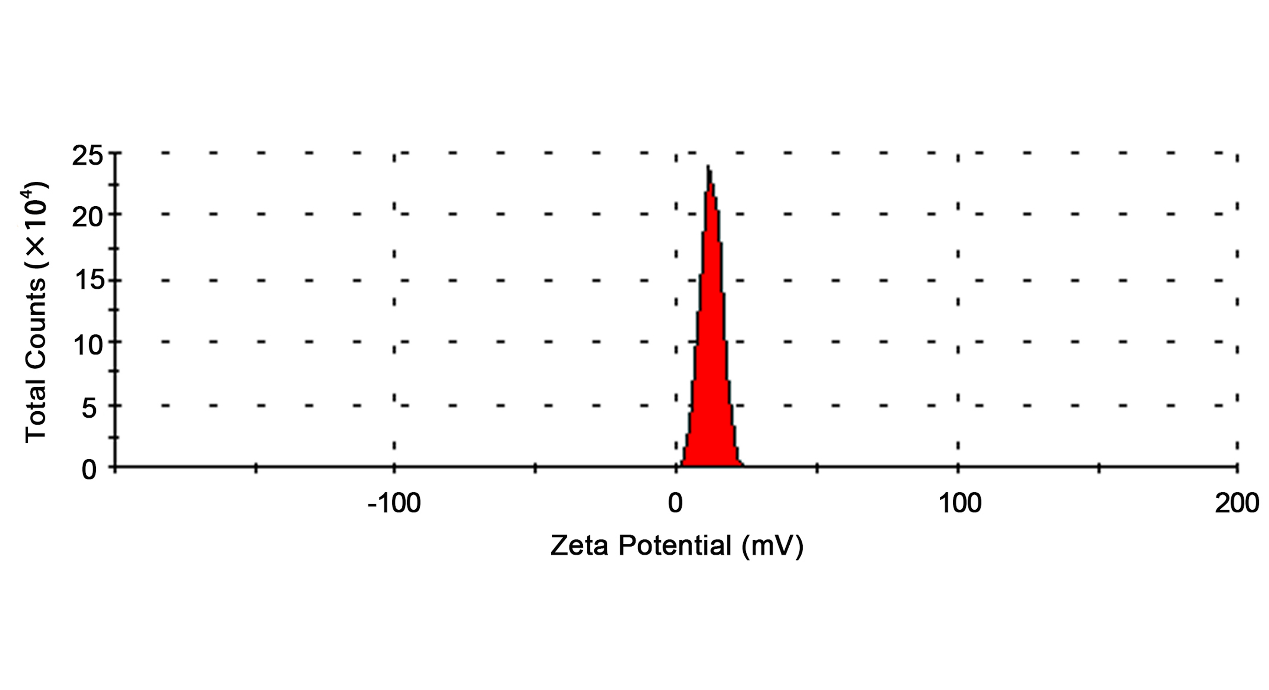
**

**Supplementary Figure S1** The average potential of BAF312@CaP-NPs in aqueous solution (pH 6.0) was +12.5 ± 0.006 mV.
